# Supplementary material for: GBS-SNP-CROP: a reference-optional pipeline for SNP discovery and plant germplasm characterization using variable length, paired-end genotyping-by-sequencing data
Source: PubMed Central journal article supplement (PMC4709900; doi:10.1186/s12859-016-0879-y), 2016-01-12
Supplement: 12859_2016_879_MOESM3_ESM.pdf [file 12859_2016_879_MOESM3_ESM.pdf]

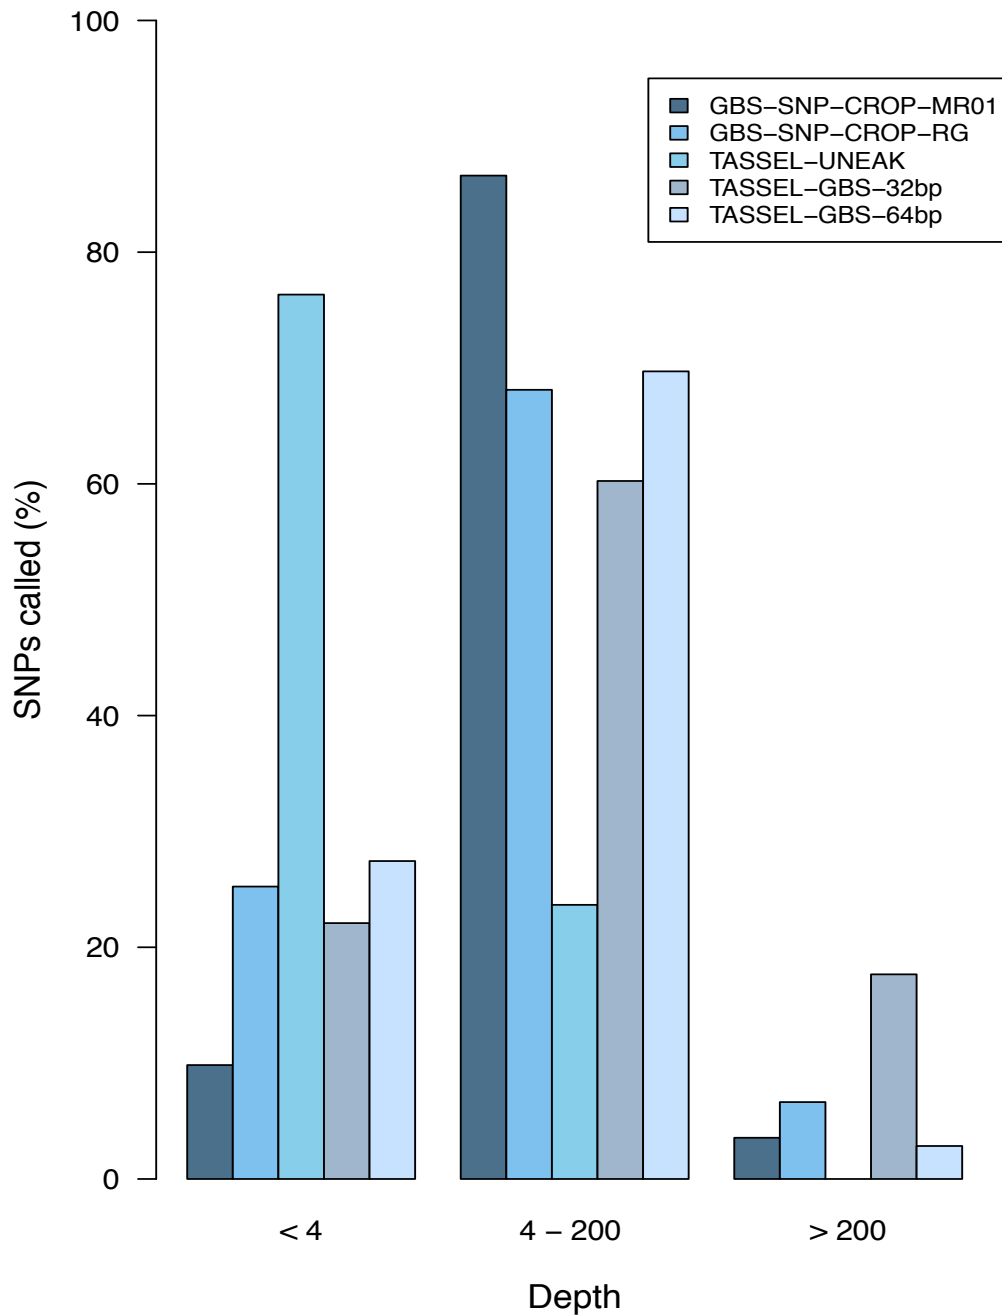

**Additional file 3: The distribution of pre-filtered SNPs across three different depth classes: Low (<4), Acceptable (4-200), and Over-represented (>200).** The plot compares the distributions of average read depths for the pre-filtered SNPs called by the five evaluated pipelines (Table 4A).
