# Supplementary material for: GBS-SNP-CROP: a reference-optional pipeline for SNP discovery and plant germplasm characterization using variable length, paired-end genotyping-by-sequencing data
Source: PubMed Central journal article supplement (PMC4709900; doi:10.1186/s12859-016-0879-y), 2016-01-12
Supplement: 12859_2016_879_MOESM4_ESM.pdf [file 12859_2016_879_MOESM4_ESM.pdf]

**Additional file 4: List of the 48 *A. arguta* genotypes used for GBS-SNP-CROP development and analysis.** The genotypes from the USDA National Clonal Germplasm Repository used for this study, along with their barcodes (SRA Accession number SRR2296676) and the number of parsed GBS reads obtained for each from Stage 1 of the GBS- SNP-CROP workflow.

| Number | Genotype ID                       | Barcode sequence | Number of parsed Paired-End reads |
|--------|-----------------------------------|------------------|-----------------------------------|
| 1      | Cherry Bomb                       | TGACGCCA         | 7413440                           |
| 2      | <sup>5</sup> Chang Bai Mountain 3 | CAGATA           | 11533362                          |
| 3      | <sup>2</sup> DACT 213             | GAAGTG           | 11937552                          |
| 4      | <sup>1</sup> ORUS 2-16            | TAGCGGAT         | 12638534                          |
| 5      | <sup>3</sup> 40537-C              | TATTCGCAT        | 11914118                          |
| 6      | Meader Male                       | CCGAACA          | 5928514                           |
| 7      | ORUS 1-3                          | GGAAGACAT        | 3857518                           |
| 8      | Ananasnaya                        | AACGCACATT       | 3889648                           |
| 9      | Chang Bai Mountain 4              | CCTTGCCATT       | 8735374                           |
| 10     | <sup>BR</sup> Opitz Male          | GGTATA           | 5665492                           |
| 11     | <sup>BR</sup> Opitz Male          | TCTTGG           | 6587636                           |
| 12     | Frenchman's Bay                   | GGTGT            | 6368934                           |
| 13     | ORUS 2-17                         | GGATA            | 2219262                           |
| 14     | Chang Bai Mountain 5              | ACTGCGAT         | 1855156                           |
| 15     | Michigan State                    | TTCGTT           | 2299744                           |
| 16     | 74-46                             | TGGCAACAGA       | 1719752                           |
| 17     | Early Cordifolia                  | CTCGTCG          | 4386424                           |
| 18     | Cornell                           | GCCTACCT         | 3747072                           |
| 19     | <sup>BR</sup> Dumbarton Oaks      | GGAACGA          | 4174406                           |
| 20     | 74-55                             | ACTGCT           | 3007282                           |
| 21     | Jumbo                             | CGTGGACAGT       | 3264126                           |
| 22     | ORUS 1-4                          | TGCTT            | 4645838                           |
| 23     | 74-9                              | CGCACCAATT       | 2766536                           |
| 24     | Chang Bai Mountain 2              | CTCGCGG          | 3433118                           |
| 25     | Cordifolia                        | AACTGG           | 2630926                           |
| 26     | HVSC-115                          | ATGAGCAA         | 2840748                           |
| 27     | DACT 216                          | CTTGA            | 5630854                           |
| 28     | New Zealand                       | GCGTCCT          | 5886234                           |
| 29     | Geneva 3                          | ACCAGGA          | 3004690                           |
| 30     | Langer                            | CCACTCA          | 5397382                           |
| 31     | <sup>BR</sup> Dumbarton Oaks      | TCACGGAAG        | 3955312                           |
| 32     | Issai small fruit variant         | ATATCGCCA        | 3151572                           |
| 33     | Meader (Paul Klassen)             | CTCTA            | 5185634                           |
| 34     | 74-32                             | GGTGCACATT       | 5488740                           |
| 35     | West                              | CAGAGGT          | 1264734                           |
| 36     | Chico                             | AATGAACGA        | 3305514                           |
| 37     | Issai                             | GAAGCA           | 4525900                           |
| 38     | Hardy Red                         | AACGTGCCT        | 4646988                           |
| 39     | Geneva 2                          | CCTCG            | 2920130                           |
| 40     | #211 Male                         | GCGCCG           | 6017050                           |
| 41     | DACT 217                          | TAGATGA          | 5626158                           |
| 42     | ORUS 2-1                          | TTGCTG           | 2556928                           |
| 43     | ORUS 1-8                          | ACAGT            | 2096570                           |
| 44     | <sup>4</sup> ORUS 1-6             | CATAT            | 11782074                          |
| 45     | ORUS 2-7                          | CATCTGCCG        | 2135604                           |
| 46     | ORUS 3-3                          | GGACAG           | 8156828                           |
| 47     | Turrets Male                      | AAGACGCT         | 2367032                           |
| 48     | Geneva 1                          | ATCCG            | 2817216                           |
| 49     | Meader                            | CTTAG            | 3917364                           |
| 50     | HVSC-117                          | CAACCACACA       | 3209702                           |

<sup>BR</sup> Biological Replicate; <sup>1-5</sup> Ranks, in terms of total number of parsed PE reads
